# Supplementary material for: The diverse radiodont fauna from the Marjum Formation of Utah, USA (Cambrian: Drumian)
Source: PeerJ. 2021 Jan 19;9:e10509. doi: 10.7717/peerj.10509 (PMC7821760; doi:10.7717/peerj.10509)
Supplement: Supplemental Information 3 [file peerj-09-10509-s003.xlsx]

## Sheet: MaterialStudied
The diverse radiodont fauna from the Marjum Formation of Utah, USA (Cambrian: Drumian)
Pates, S., Lerosey-Aubril, R., Daley, A.C., Kier, C., Bonino, E. & Ortega-Hernández, J.
SUPPLEMENTARY TABLE S1
Specimens studied
BACK TO THE PAST MUSEUM (BPM)
Inventory #	Taxon	Nature	Locality	Horizon	Collector	Figure (herein)	References
BPM1100	Caryosyntrips camurus?	Isolated frontal appendage	Red Wash (locality 716 of Robison & Babcock, 2011), House Range, Utah, USA. GPS: 39.317251°, -113.269903°	Marjum Fm., Ptychagnostus punctuosus Zone, Drumian, Miaolingian		Fig. 8	This study
BPM 1108	Buccaspinea cooperi gen. et sp. nov.	Body lacking the cephalic carapace	Kells Knolls (locality 1 of Rigby et al. 2010), House Range, Utah, USA. GPS: 39.270709°, -113.283868°	Marjum Fm., Ptychagnostus punctuosus Zone, Drumian, Miaolingian	Jason Cooper	Figs. 2-6	This study
BIODIVERSITY INSTITUTE OF THE UNIVERSITY OF KANSAS (KUMIP)
Inventory #	Taxon	Nature	Locality	Horizon	Collector	Figure (herein)	References
KUMIP134879	Pahvantia hastata	Incomplete carapace central element	Locality 115 (Type section), Wheeler Amphitheatre, House Range, UT, USA; GPS: 39.355280°, -113.279940°	Wheeler Fm., upper 30 m, P. atavus Zone, lower Drumian, Miaolingian	Robert L. Harris	Fig. 7E	Robison & Richards, 1981, pl. 8, fig. 1; Lerosey-Aubril & Pates, 2018, sup. fig. 2c
KUMIP153917	Tuzoia guntheri (holotype)	Left valve of carapace	Red Wash (locality 716 of Robison & Babcock, 2011), House Range, Utah, USA. GPS: 39.317251°, -113.269903°	Marjum Fm., Ptychagnostus punctuosus Zone, Drumian, Miaolingian	Robert L. Harris	Fig. 10D	Robison & Richards, 1981, pl. 7, fig. 2;
KUMIP204797	Branchiocaris pretiosa	Complete invidual	Sponge Gully (locality 347 of Robison & Babcock, 2011), House Range, Utah, USA. GPS: 39.268558°, -113.309395°	Marjum Fm., Ptychagnostus punctuosus Zone, Drumian, Miaolingian	Lloyd & Metta Gunther	Fig. 10F	Briggs & Robison, 1984, figs. 5, 6;
KUMIP134878 (part & counterpart)	Pahvantia hastata	Carapace central element	Locality 115 (Type section), Wheeler Amphitheatre, House Range, UT, USA; GPS: 39.355280°, -113.279940°	Wheeler Fm., upper 30 m, P. atavus Zone, lower Drumian, Miaolingian	Robert L. Harris	not re-illustrated	Robison & Richards, 1981, pl. 8, fig. 2; Robison et al., 2015 ('Hurdia'), fig. 161 (upper left); Lerosey-Aubril & Pates, 2018, sup. fig. 2a
KUMIP314084 (part & counterpart)	Pahvantia hastata	Carapace central element	Locality MIP-2006-47 ('Gunther quarry'), c. 30 miles NW of Delta, Drum Mts., UT, USA; GPS: 39.509440°, -112996890°	Wheeler Fm., upper, P. atavus Zone, lower Drumian, Miaolingian	Gunther family (1997)	not re-illustrated	Lerosey-Aubril & Pates, 2018, sup. fig. 2e
KUMIP314089 (part & counterpart)	Pahvantia hastata	Dislocated tripartite cephalic carapace & frontal appendage	Locality MIP-2006-48, Antelope Mt., House Range, UT, USA; GPS: 39.308280°, -113.286360°	Wheeler Fm., upper, P. atavus Zone, lower Drumian, Miaolingian	Glade Gunther (1990)	not re-illustrated	Lerosey-Aubril & Pates, 2018, figs. 1, 3e, sup. fig. 2g, h
KUMIP314090	Pahvantia hastata	Incomplete carapace central element	Locality MIP-2006-41, House Range, UT, USA; GPS: precise location unknown	Wheeler Fm., lower Drumian, Miaolingian	Val Gunther (1987)	not re-illustrated	Lerosey-Aubril & Pates, 2018, sup. fig. 2f
NATURAL HISTORY MUSEUM OF UTAH (UMNH.IP)
Inventory #	Taxon	Nature	Locality	Horizon	Collector	Figure (herein)	References
UMNH.IP.5621	Itagnostus interstrictus	Complete dorsal exoskeleton	Precise locality unknown, House Range, UT, USA;	Marjum Fm., lower to middle, P. atavus to P. punctuosus Zones, Drumian, Miaolingian	unknown	Fig. 10A	This study
UMNH.IP.6088a+b (part & counterpart)	Pahvantia hastata	incomplete carapace central element	Precise locality unknown, Antelope Mountains area, House Range, UT, USA;	Wheeler Fm., P. atavus Zone, lower Drumian, Miaolingian	unknown	Fig. 7F	Lerosey-Aubril et al. in press, fig. 4G, H
UMNH.IP.6093	Pahvantia hastata	Incomplete carapace central element	Precise locality unknown, Antelope Mountains area, House Range, UT, USA;	Wheeler Fm., P. atavus Zone, lower Drumian, Miaolingian	unknown	Fig. 7G	Lerosey-Aubril et al. in press, fig. 4K
UMNH.IP.6101	Pahvantia hastata	incomplete carapace central element	No precise location, House Range, UT, USA.	Marjum Fm., lower to middle, P. atavus to P. punctuosus Zones, Drumian, Miaolingian	Unknown	Fig. 7B, D	This study
UMNH.IP.6105	Pahvantia hastata	incomplete carapace central element	No precise location, House Range, UT, USA.	Marjum Fm., lower to middle, P. atavus to P. punctuosus Zones, Drumian, Miaolingian	Unknown	Fig. 7C	This study
UMNH.IP.6694	Pahvantia hastata	incomplete carapace central element	No precise location, House Range, UT, USA.	Marjum Fm., lower to middle, P. atavus to P. punctuosus Zones, Drumian, Miaolingian	Unknown	Fig. 7A	This study
UMNH.IP.6122a+b (part and counterpart)	Caryosyntrips camurus	Isolated frontal appendage	No precise location, House Range, UT, USA.	Marjum Fm., lower to middle, P. atavus to P. punctuosus Zones, Drumian, Miaolingian	Unknown	Fig. 9	This study
UMNH.IP.6323	Perspicaris? elliptocephala	Pair of disarticulated carapace valves	No precise location, House Range, UT, USA.	Marjum Fm., lower to middle, P. atavus to P. punctuosus Zones, Drumian, Miaolingian	Unknown	Fig. 10E	This study
UMNH.IP.6075a+b (part and counterpart)	Pahvantia hastata	incomplete carapace central element	Precise locality unknown, Antelope Mountains area, House Range, UT, USA;	Wheeler Fm., P. atavus Zone, lower Drumian, Miaolingian	unknown	not re-illustrated	Lerosey-Aubril et al. in press, fig. 4C, D
UMNH.IP.6091	Pahvantia hastata	Incomplete carapace central element	Precise locality unknown, possibly Swasey Spring area, House Range, UT, USA;	Wheeler Fm., P. atavus Zone, lower Drumian, Miaolingian	unknown	not re-illustrated	Lerosey-Aubril et al. in press, fig. 4I
UMNH.IP.6095a+b (part and counterpart)	Pahvantia hastata	Incomplete carapace central element	Precise locality unknown, probably Wheeler Amphitheatre area, House Range, UT, USA;	Wheeler Fm., P. atavus Zone, lower Drumian, Miaolingian	unknown	not re-illustrated	Lerosey-Aubril et al. in press, fig. 4M, N
UMNH.IP.6103	Pahvantia hastata	Incomplete carapace central element	Precise locality unknown, Antelope Mountains area, House Range, UT, USA;	Wheeler Fm., P. atavus Zone, lower Drumian, Miaolingian	unknown	not re-illustrated	Lerosey-Aubril et al. in press, fig. 4F
UMNH.IP.6104	Pahvantia hastata	incomplete carapace central element	Precise locality unknown, Antelope Mountains area, House Range, UT, USA;	Wheeler Fm., P. atavus Zone, lower Drumian, Miaolingian	unknown	not re-illustrated	Lerosey-Aubril et al. in press, fig. 4E
UMNH.IP.6118	Pahvantia hastata	Dislocated tripartite cephalic carapace	Precise locality unknown, probably Wheeler Amphitheatre area, House Range, UT, USA;	Wheeler Fm., P. atavus Zone, lower Drumian, Miaolingian	unknown	not re-illustrated	Lerosey-Aubril et al. in press, fig. 4R
UMNH.IP.6119a+b (part and counterpart)	Pahvantia hastata	Incomplete carapace central element	Precise locality unknown, Antelope Mountains area, House Range, UT, USA;	Wheeler Fm., P. atavus Zone, lower Drumian, Miaolingian	unknown	not re-illustrated	Lerosey-Aubril et al. in press, fig. 4A, B
SMITHSONIAN NATIONAL MUSEUM OF NATURAL HISTORY (USNM-PAL)
Inventory #	Taxon	Nature	Locality	Horizon	Collector	Figure (herein)	References
USNM-PAL374593	Peytoia nathorsti	Incomplete body	Sponge Gully (locality 347 of Robison & Babcock, 2011), House Range, Utah, USA. GPS: 39.268558°, -113.309395°	Marjum Fm., Ptychagnostus punctuosus Zone, Drumian, Miaolingian	Thomas T. Johnson	Fig. 10C	Briggs & Robison, 1984, figs. 3, 4; Pates et al. 2018, figs. 6.1-5, 7.1-5;
UNIVERSITY OF UTAH, GEOLOGICAL DEPARTMENT (UU)
Inventory #	Taxon	Nature	Locality	Horizon	Collector	Figure (herein)	References
UU07021.3	Putative hydrozoan	Almost complete body	Sponge Gully (locality 347 of Robison & Babcock, 2011), House Range, Utah, USA. GPS: 39.268558°, -113.309395°	Marjum Fm., Ptychagnostus punctuosus Zone, Drumian, Miaolingian	Susan L. Halgedahl & Richard D. Jarrard	Fig. 10B	Cartwright et al. 2007, fig. 3;
MUSEUM OF COMPARATIVE ZOOLOGY, HARVARD UNIVERSITY (MCZ)
Inventory #	Taxon	Nature	Locality	Horizon	Collector	Figure (herein)	References
MCZ 103205	Hurdia victoria	Carapace central element	Walcott Quarry, Ridge between Mount Field and Wapta Mountains, BC, Canada. GPS: 51.438486°, -116.472228°	Burgess Shale Fm., Ptychagnostus praecurrens Zone, Wuliuan, Miaolingian	Percy Raymond et al.	not re-illustrated
MCZ 103212	Hurdia victoria	Carapace central element	Walcott Quarry, Ridge between Mount Field and Wapta Mountains, BC, Canada. GPS: 51.438486°, -116.472228°	Burgess Shale Fm., Ptychagnostus praecurrens Zone, Wuliuan, Miaolingian	Percy Raymond et al.	not re-illustrated
MCZ 103208	Hurdia victoria	Carapace central element	Walcott Quarry, Ridge between Mount Field and Wapta Mountains, BC, Canada. GPS: 51.438486°, -116.472228°	Burgess Shale Fm., Ptychagnostus praecurrens Zone, Wuliuan, Miaolingian	Percy Raymond et al.	not re-illustrated
MCZ 103203	Hurdia victoria	Carapace central element	Walcott Quarry, Ridge between Mount Field and Wapta Mountains, BC, Canada. GPS: 51.438486°, -116.472228°	Burgess Shale Fm., Ptychagnostus praecurrens Zone, Wuliuan, Miaolingian	Percy Raymond et al.	not re-illustrated
MCZ 103206	Hurdia victoria	Carapace central element	Walcott Quarry, Ridge between Mount Field and Wapta Mountains, BC, Canada. GPS: 51.438486°, -116.472228°	Burgess Shale Fm., Ptychagnostus praecurrens Zone, Wuliuan, Miaolingian	Percy Raymond et al.	not re-illustrated
MCZ 100357	Hurdia victoria	Carapace central element	Walcott Quarry, Ridge between Mount Field and Wapta Mountains, BC, Canada. GPS: 51.438486°, -116.472228°	Burgess Shale Fm., Ptychagnostus praecurrens Zone, Wuliuan, Miaolingian	Percy Raymond et al.	not re-illustrated
MCZ 103213	Hurdia triangulata	Carapace central element	Walcott Quarry, Ridge between Mount Field and Wapta Mountains, BC, Canada. GPS: 51.438486°, -116.472228°	Burgess Shale Fm., Ptychagnostus praecurrens Zone, Wuliuan, Miaolingian	Percy Raymond et al.	not re-illustrated
MCZ 103297	Hurdia victoria	Carapace central element	Walcott Quarry, Ridge between Mount Field and Wapta Mountains, BC, Canada. GPS: 51.438486°, -116.472228°	Burgess Shale Fm., Ptychagnostus praecurrens Zone, Wuliuan, Miaolingian	Percy Raymond et al.	not re-illustrated
MCZ 103214	Hurdia victoria	Carapace central element	Walcott Quarry, Ridge between Mount Field and Wapta Mountains, BC, Canada. GPS: 51.438486°, -116.472228°	Burgess Shale Fm., Ptychagnostus praecurrens Zone, Wuliuan, Miaolingian	Percy Raymond et al.	not re-illustrated
MCZ 103211	Hurdia victoria	Carapace central element	Walcott Quarry, Ridge between Mount Field and Wapta Mountains, BC, Canada. GPS: 51.438486°, -116.472228°	Burgess Shale Fm., Ptychagnostus praecurrens Zone, Wuliuan, Miaolingian	Percy Raymond et al.	not re-illustrated
MCZ 103210	Hurdia victoria	Carapace central element	Walcott Quarry, Ridge between Mount Field and Wapta Mountains, BC, Canada. GPS: 51.438486°, -116.472228°	Burgess Shale Fm., Ptychagnostus praecurrens Zone, Wuliuan, Miaolingian	Percy Raymond et al.	not re-illustrated
MCZ 103216	Hurdia victoria	Carapace central element	Walcott Quarry, Ridge between Mount Field and Wapta Mountains, BC, Canada. GPS: 51.438486°, -116.472228°	Burgess Shale Fm., Ptychagnostus praecurrens Zone, Wuliuan, Miaolingian	Percy Raymond et al.	not re-illustrated
MCZ 203204	Hurdia victoria	Carapace central element	Walcott Quarry, Ridge between Mount Field and Wapta Mountains, BC, Canada. GPS: 51.438486°, -116.472228°	Burgess Shale Fm., Ptychagnostus praecurrens Zone, Wuliuan, Miaolingian	Percy Raymond et al.	not re-illustrated
MCZ 103215	Hurdia victoria	Carapace central element	Walcott Quarry, Ridge between Mount Field and Wapta Mountains, BC, Canada. GPS: 51.438486°, -116.472228°	Burgess Shale Fm., Ptychagnostus praecurrens Zone, Wuliuan, Miaolingian	Percy Raymond et al.	not re-illustrated
MCZ 103217	Hurdia triangulata	Carapace central element	Walcott Quarry, Ridge between Mount Field and Wapta Mountains, BC, Canada. GPS: 51.438486°, -116.472228°	Burgess Shale Fm., Ptychagnostus praecurrens Zone, Wuliuan, Miaolingian	Percy Raymond et al.	not re-illustrated
MCZ 103209	Hurdia victoria	Carapace central element	Walcott Quarry, Ridge between Mount Field and Wapta Mountains, BC, Canada. GPS: 51.438486°, -116.472228°	Burgess Shale Fm., Ptychagnostus praecurrens Zone, Wuliuan, Miaolingian	Percy Raymond et al.	not re-illustrated
MCZ 103218	Hurdia victoria	Carapace central element	Walcott Quarry, Ridge between Mount Field and Wapta Mountains, BC, Canada. GPS: 51.438486°, -116.472228°	Burgess Shale Fm., Ptychagnostus praecurrens Zone, Wuliuan, Miaolingian	Percy Raymond et al.	not re-illustrated
References
CARTWRIGHT, P., HALGEDAHL, S. L., HENDRICKS, J. R., JARRARD, R. D., MARQUES, A. C., COLLINS, G. & LIEBERMAN, B. S. 2007. Exceptionally preserved jellyfishes from the Middle Cambrian. PLoS ONE 2(10), e1121. doi: 10.1371/journal.pone.0001121
LEROSEY-AUBRIL, R. & PATES, S. 2018. New suspension-feeding radiodont suggests evolution of microplanktivory in Cambrian macronekton. Nature Communications 9, 3774. doi:10.1038/s41467-018-06229-7
LEROSEY-AUBRIL, R., KIMMIG, J., PATES, S., SKABELUND, J., WEUG, A. & ORTEGA-HERNÁNDEZ, J. In press. New exceptionally-preserved panarthropods from the Drumian Wheeler Konservat-Lagerstätte of the House Range of Utah. Papers in Palaeontology. doi:10.1002/spp2.1307
PATES, S., DALEY, A. C. & LIEBERMAN, B. S. 2018. Hurdiid radiodontans from the middle Cambrian (Series 3) of Utah. Papers in Palaeontology 92, 99-113
ROBISON, R. A. & BABCOCK, L. E. 2011. Systematics, paleobiology, and taphonomy of some exceptionally preserved trilobites from Cambrian Lagerstätten of Utah. Kansas University Paleontological Contributions 5, 1–47.
ROBISON, R. A. & RICHARDS, B. C. 1981. Larger bivalve arthropods from the Middle Cambrian of Utah. The University of Kansas Paleontological Contributions 106, 1–28.
