# Supplementary material for: The diverse radiodont fauna from the Marjum Formation of Utah, USA (Cambrian: Drumian)
Source: PeerJ. 2021 Jan 19;9:e10509. doi: 10.7717/peerj.10509 (PMC7821760; doi:10.7717/peerj.10509)
Supplement: Supplemental Information 4 [file peerj-09-10509-s004.xlsx]

## Sheet: Composition&Lifestyles
The diverse radiodont fauna from the Marjum Formation of Utah, USA (Cambrian: Drumian)
Pates, S., Lerosey-Aubril, R., Daley, A.C., Kier, C., Bonino, E. & Ortega-Hernández, J.
SUPPLEMENTARY DATA
Composition and lifestyles of the Cambrian exceptionally-preserved biotas of the House Range of Utah, USA
WHEELER-HOUSE RANGE EXCEPTIONALLY-PRESERVED BIOTA
Biota:	Fauna:				Lifestyles:
Total number of genera: 68	Total number of genera: 63				NB: Non-animal taxa are excluded
Total number of species: 82	Total number of species: 77				Lifestyles: B(en), endobenthic; B(ep), epibenthic; P, pelagic. The category 'epibenthic' includes all taxa principally living on the seafloor, even if they may be capable of temporary swimming (nektobenthic; e.g. most trilobites). The category 'pelagic' refers to the animals spending most of their lives in the water column some distance from the seafloor, either as active swimmers (nekton) or pas…
HIGH TAXA	GENUS	SPECIES	LIFESTYLE		Categories	# of genera	% of total generic diversity
CYANOBACTERIA	Marpolia	Marpolia spissa Walcott, 1919	NA		Endobenthic	2	3.1746
CYANOBACTERIA	Morania	Morania fragmenta Walcott, 1919	NA		Epibenthic	41	65.0794
ALGAE	Fuxianospira	Fuxianospira girata Chen & Zhou, 1997	NA		Pelagic	20	31.746
ALGAE	Margaretia	Margaretia dorus Walcott, 1919	NA
ALGAE	Sinocylindra	Sinocylindra sp. [Robison et al. 2015]	NA
PORIFERA	Choia	Choia carteri Walcott, 1920	B(ep)
PORIFERA	Choia	Choia utahensis Walcott, 1920	B(ep)
PORIFERA	Diagonella	Diagonella cyathiformis (Dawson & Hinde, 1889)	B(ep)
PORIFERA	Diagonella	Diagonella robisoni Rigby, 1978	B(ep)
PORIFERA	Diagonella?	Diagonella? sp. [This study; not illustrated]	B(ep)
PORIFERA	Kiwetinokia	Kiwetinokia utahensis Walcott, 1920	B(ep)
PORIFERA	Lenicida	Lenicida cf. hindei [Foster & Gaines, 2016]	B(ep)
PORIFERA	Sentinella	Sentinella draco Walcott, 1920	B(ep)
PORIFERA	Valospongia	Valospongia sp. [Robison et al. 2015]	B(ep)
PORIFERA	Reticulosan? gen. et sp. indet.	Reticulosan? gen. et sp. indet. [This study; not illustrated]	B(ep)
CNIDARIA	Cambromedusa	Cambromedusa furcula Willoughby & Robison, 1979	P
BRACHIOPODA	Acrothele	Acrothele subsidua (White, 1874)	B(ep)
BRACHIOPODA	Acrothyra	Acrothyra minor (Walcott, 1912b)	B(ep)
BRACHIOPODA	Acrothyra	Acrothyra urania (Walcott, 1908c)	B(ep)
BRACHIOPODA	Dictyonina	Dictyonina sp. McGhee, 1978	B(ep)
BRACHIOPODA	Lingulella	Lingulella spp. [Robison et al. 2015]	B(ep)
BRACHIOPODA	Micromitra	Micromitra modesta (Lochman, 1940)	B(ep)
BRACHIOPODA	Prototreta	Prototreta attenuata (Meek, 1873)	B(ep)
BRACHIOPODA	rhynchonelliform indet.	rhynchonelliform indet. [Robison et al. 2015]	B(ep)
MOLLUSCA	Melopegma	Melopegma georginensis Runnegar & Jell, 1976	B(ep)
STEM-LOPHOPHORATA	Hyolithes?	Hyolithes? Spp. [Robison et al. 2015]	B(ep)
ARTHROPODA (AGNOSTINA)	Hypagnostus	Hypagnostus parvifrons (Linnarsson, 1869)	P
ARTHROPODA (AGNOSTINA)	Itagnostus	Itagnostus interstrictus (White, 1874)	P
ARTHROPODA (AGNOSTINA)	Lejopyge	Lejopyge seminula (Whitehouse, 1939)	P
ARTHROPODA (AGNOSTINA)	Peronopsis	Peronopsis acadica (Hartt in Dawson, 1868)	P
ARTHROPODA (AGNOSTINA)	Peronopsis	Peronopsis depressa Westergard, 1946	P
ARTHROPODA (AGNOSTINA)	Peronopsis	Peronopsis gaspensis Rasetti, 1948	P
ARTHROPODA (AGNOSTINA)	Peronopsis	Peronopsis montis (Matthew, 1899)	P
ARTHROPODA (AGNOSTINA)	Peronopsis	Peronopsis scutilis (Salter in Hicks, 1872)	P
ARTHROPODA (AGNOSTINA)	Peronopsis	Peronopsis segmenta Robison, 1964a	P
ARTHROPODA (AGNOSTINA)	Ptychagnostus	Ptychagnostus atavus (Tullberg, 1880)	P
ARTHROPODA (AGNOSTINA)	Ptychagnostus	Ptychagnostus cuyanus (Rusconi, 1948)	P
ARTHROPODA (AGNOSTINA)	Ptychagnostus	Ptychagnostus gibbus (Linnarsson, 1869)	P
ARTHROPODA (AGNOSTINA)	Ptychagnostus	Ptychagnostus occultatus Öpik, 1979	P
ARTHROPODA (AGNOSTINA)	Ptychagnostus	Ptychagnostus sinicus Lu, 1957	P
ARTHROPODA (TRILOBITA)	Altiocculus	Altiocculus harrisi (Robison, 1971)	B(ep)
ARTHROPODA (TRILOBITA)	Asaphiscus	Asaphiscus wheeleri Meek, 1873	B(ep)
ARTHROPODA (TRILOBITA)	Bathyuriscus	Bathyuriscus fimbriatus Robison, 1964a	B(ep)
ARTHROPODA (TRILOBITA)	Bolaspidella	Bolaspidella housensis (Walcott, 1886)	B(ep)
ARTHROPODA (TRILOBITA)	Bolaspidella	Bolaspidella reesae Robison & Babcock, 2011	B(ep)
ARTHROPODA (TRILOBITA)	Brachyaspidion	Brachyaspidion microps Robison, 1971	B(ep)
ARTHROPODA (TRILOBITA)	Brachyaspidion	Brachyaspidion sulcatum Robison, 1964a	B(ep)
ARTHROPODA (TRILOBITA)	Ehmaniella	Ehmaniella whietei Robison & Babcock, 2011	B(ep)
ARTHROPODA (TRILOBITA)	Elrathia	Elrathia kingii (Meek, 1870)	B(ep)
ARTHROPODA (TRILOBITA)	Hemirhodon	Hemirhodon amplipyge Robison, 1964a	B(ep)
ARTHROPODA (TRILOBITA)	Jenkinsonia	Jenkinsonia varga Robison, 1971	B(ep)
ARTHROPODA (TRILOBITA)	Modocia	Modocia brevispina Robison, 1964a	B(ep)
ARTHROPODA (TRILOBITA)	Modocia	Modocia kohli Robison & Babcock, 2011	B(ep)
ARTHROPODA (TRILOBITA)	Olenoides	Olenoides nevadensis (Meek, 1870)	B(ep)
ARTHROPODA (TRILOBITA)	Ptychoparella	Ptychoparella lloydi Robison and Babcock, 2011	B(ep)
ARTHROPODA (TRILOBITA)	Zacanthoides	Zacanthoides spinosus (Walcott, 1886)	B(ep)
ARTHROPODA (OTHERS)	Dicranocaris	Dicranocaris guntherorum? Briggs et al., 2008	B(ep) or P
ARTHROPODA (OTHERS)	Isoxys	Isoxys longissimus Simonetta & Delle Cave 1975	P
ARTHROPODA (OTHERS)	Kanoshoia	Kanoshoia rectifrons Lerosey-Aubril et al. In press	B(ep) or P
ARTHROPODA (OTHERS)	Leanchoilia	Leanchoilia cf. I. illecebrosa Lerosey-Aubril et al. In press	B(ep) or P
ARTHROPODA (OTHERS)	Messorocaris	Messorocaris magna Lerosey-Aubril & Skabelund 2017	B(ep)
ARTHROPODA (OTHERS)	Mollisonia	Mollisonia symmetrica Walcott, 1912a	B(ep)
ARTHROPODA (OTHERS)	Naraoia	Naraoia compacta Walcott, 1912a	B(ep)
ARTHROPODA (OTHERS)	Perspicaris?	Perspicaris? dilatus Robison & Richards, 1981	P
ARTHROPODA (OTHERS)	Pseudoarctolepis	Pseudoarctolepis sharpi Brooks & Caster, 1956	P
ARTHROPODA (OTHERS)	Thelxiope	Thelxiope holmani Lerosey-Aubril et al. 2020	B(ep)
ARTHROPODA (OTHERS)	Thelxiope	Thelxiope spinosa Conway Morris & Robison, 1988	B(ep)
ARTHROPODA (OTHERS)	Tuzoia?	Tuzoia? petersoni Robison & Richards, 1981	P
ARTHROPODA (OTHERS)	Arthropoda indet. A	Arthropoda indet. A [Briggs & Robison, 1984; 'Sidneyia sp.']	B(ep)
STEM-ARTHROPODA (RADIODONTA)	Anomalocarididae? gen. et sp. nov.	Anomalocarididae? gen. et sp. nov.[Briggs et al., 2008; 'Anomalocaris sp.' ]	P
STEM-ARTHROPODA (RADIODONTA)	Amplectobelua	Amplectobelua cf. A. stephenensis [Lerosey-Aubril et al. In press]	P
STEM-ARTHROPODA (RADIODONTA)	Caryosyntrips	Caryosyntrips serratus Daley & Budd, 2010	P
STEM-ARTHROPODA (RADIODONTA)	Buccaspinea	Buccaspinea cooperi? [Lerosey-Aubril et al. In press, 'Hurdia sp. nov. A; This study]	P
STEM-ARTHROPODA (RADIODONTA)	Pavhantia	Pavhantia hastata Robison & Richards, 1981	P
STEM-ARTHROPODA (RADIODONTA)	Pavhantia?	Pavhantia? sp. [This study; not illustrated]	P
STEM-ARTHROPODA (RADIODONTA)	Peytoia	Peytoia nathorsti Walcott, 1911	P
STEM-ARTHROPODA (RADIODONTA)	Stanleycaris?	Stanleycaris? sp. [Robison, 1985, 'Aysheaia prolata'; Pates et al. 2017]	P
ECHINODERMATA (SOLUTA)	Archaeocothurnus	Archaeocothurnus bifida (Ubaghs & Robison, 1988)	B(ep)
ECHINODERMATA (EOCRINOIDEA)	Coleicarpus	Coleicarpus sprinklei (Ubaghs & Robison, 1988)	B(ep)
ECHINODERMATA (EDRIOASTEROIDEA)	Gogia	Gogia spiralis Robison, 1965	B(ep)
HEMICHORDATA (PTEROBRANCHIA)	Spartobranchus	Spartobranchus sp. [Caron et al. 2013]	B(ep)
HEMICHORDATA (PTEROBRANCHIA)	Sphenoecium	Sphenoecium wheelerensis Maletz & Steiner, 2015	B(ep)
HEMICHORDATA (PTEROBRANCHIA)	Tarnagraptus	Tarnagraptus sp. LoDuca & Kramer, 2012	B(ep)
CHANCELLORIIDA	Chancelloria	Chancelloria eros Walcott, 1920	B(ep)
CHANCELLORIIDA	Chancelloria	Chancelloria pentacta Rigby, 1978	B(ep)
CHANCELLORIIDA	Chancelloria	Chancelloria sp. Rigby, 1978	B(ep)
INDETERMINATE	Worm indet. A	Worm indet. A	B(ep) or B(en)
INDETERMINATE	Worm indet. B	Worm indet. B	B(ep) or B(en)
MARJUM LAGERSTAETTE EXCEPTIONALLY-PRESERVED BIOTA
Biota:	Fauna:				Lifestyles:
Total number of genera: 82	Total number of genera: 77				NB: Non-animal taxa are excluded
Total number of species: 102	Total number of species: 97				Lifestyles: B(en), endobenthic; B(ep), epibenthic; P, pelagic. The category 'epibenthic' includes all taxa principally living on the seafloor, even if they may be capable of temporary swimming (nektobenthic; e.g. most trilobites). The category 'pelagic' refers to the animals spending most of their lives in the water column some distance from the seafloor, either as active swimmers (nekton) or pas…
HIGH TAXA	GENUS	SPECIES	LIFESTYLE		Categories	# of genera	% of total generic diversity
CYANOBACTERIA	Morania	Morania fragmenta Walcott, 1919	NA		Endobenthic	3	3.8961
ALGAE	Fuxianospira	Fuxianospira girata Chen & Zhou, 1997	NA		Epibenthic	46	59.7403
ALGAE	Margaretia	Margaretia dorus Walcott, 1919	NA		Pelagic	28	36.3636
ALGAE	Sinocylindra	Sinocylindra sp.	NA
ALGAE	Gen. indet.	Gen. et sp. indet.[Kimmig et al. 2020, their 'Skeemella']	NA
PORIFERA	Choia	Choia carteri Walcott, 1920	B(ep)
PORIFERA	Choia	Choia hindei (Dawson, 1896)	B(ep)
PORIFERA	Choia	Choia utahensis Walcott, 1920	B(ep)
PORIFERA	Diagoniella	Diagoniella cyathiformis (Dawson & Hinde, 1889)	B(ep)
PORIFERA	Diagoniella	Diagoniella hindei Walcott, 1920	B(ep)
PORIFERA	Diagoniella	Diagoniella sp. Rigby, 1983	B(ep)
PORIFERA	Diagoniella	Diagoniella magna Rigby et al. 2010	B(ep)
PORIFERA	Hamptonia	Hamptonia bowerbanki Walcott, 1920	B(ep)
PORIFERA	Hazelia	Hazelia palmata Walcott, 1920	B(ep)
PORIFERA	Hintzespongia	Hintzespongia bilamina Rigby & Gutschick, 1976	B(ep)
PORIFERA	Leptomitella	Leptomitella metta (Rigby, 1983)	B(ep)
PORIFERA	Protospongia	Protospongia? elongata Rigby, 1983	B(ep)
PORIFERA	Protospongia	Protospongia hicksi Hinde, 1888	B(ep)
PORIFERA	Ratcliffespongia	Ratcliffespongia perforata Rigby, 1969	B(ep)
PORIFERA	Testiispongia	Testiispongia venula	B(ep)
PORIFERA	Valospongia	Valospongia gigantus Rigby, 1983	B(ep)
CNIDARIA	Cambrorhytium	Cambrorhytium major (Walcott, 1908d)	B(ep)
CNIDARIA	cubozoan, order undetermined, Cartwright et al. 2007	cubozoan, order undetermined, Cartwright et al. 2007	P
CNIDARIA	hydrozoan, family Narcomedusae?, Cartwright et al. 2007	hydrozoan, family Narcomedusae?, Cartwright et al. 2007	P
CNIDARIA	scyphozoan, order Coronatae?, Cartwright et al. 2007	scyphozoan, order Coronatae?, Cartwright et al. 2007	P
CNIDARIA	scyphozoan, order Semaeostomae?, Cartwright et al. 2007	scyphozoan, order Semaeostomae?, Cartwright et al. 2007	P
BRACHIOPODA	Acrothele	Acrothele subsidua (White, 1874)	B(ep)
BRACHIOPODA	Canthylotreta	Canthylotreta marjumensis (Walcott, 1908c)	B(ep)
BRACHIOPODA	Lingulella	Lingulella spp.	B(ep)
BRACHIOPODA	Linnarssonia	Linnarssonia bellatula (Walcott, 1908c)	B(ep)
BRACHIOPODA	Linnarssonia	Linnarssonia ophirensis (Walcott, 1902)	B(ep)
BRACHIOPODA	Micromitra	Micromitra modesta (Lochman, 1940)	B(ep)
BRACHIOPODA	Nisusia	Nisusia sulcata Rowell & Caruso, 1985	B(ep)
BRACHIOPODA	Prototreta	Prototreta attenuata (Meek, 1873)	B(ep)
MOLLUSCA	Latouchella	Latouchella arguta (Resser, 1939b)	B(ep)
MOLLUSCA	Stenothecoides	Stenothecoides elongata (Walcott, 1884b)	B(ep)
STEM-LOPHOPHORATA	Hyolithes?	Hyolithes? Spp.	B(ep)
ANNELIDA	Annelida, Polychaete	Annelida, Polychaete	B(ep)
SCALIDOPHORA	Ottoia	Ottoia prolifica Walcott, 1911	B(en)
SCALIDOPHORA-PALAEOSCOLECIDA	Scathascolex	Scathascolex minor? [Smith, 2015]	B(en) or B(ep)
SCALIDOPHORA	Selkirkia	Selkirkia willoughbyi Conway Morris & Robison, 1986	B(ep)
ARTHROPODA (AGNOSTINA)	Ammagnostus	Ammagnostus laiwuensis (Lorenz, 1906)	P
ARTHROPODA (AGNOSTINA)	Ammagnostus	Ammagnostus lochmanae (Howell & Duncan, 1939)	P
ARTHROPODA (AGNOSTINA)	Cotalagnostus	Cotalagnostus new species Robison et al. 2015	P
ARTHROPODA (AGNOSTINA)	Doryagnostus	Doryagnostus incertus (Broegger, 1878)	P
ARTHROPODA (AGNOSTINA)	Hypagnostus	Hypagnostus parvifrons (Linnarsson, 1869)	P
ARTHROPODA (AGNOSTINA)	Iniospheniscus	Iniospheniscus talis Öpik, 1979	P
ARTHROPODA (AGNOSTINA)	Itagnostus	Itagnostus interstrictus (White, 1874)	P
ARTHROPODA (AGNOSTINA)	Lejopyge	Lejopyge hybridus (Broegger, 1878)	P
ARTHROPODA (AGNOSTINA)	Linguagnostus	Linguagnostus perplexus Robison, 1964a	P
ARTHROPODA (AGNOSTINA)	Peronopsis	Peronopsis acadica (Hartt in Dawson, 1868)	P
ARTHROPODA (AGNOSTINA)	Peronopsis	Peronopsis segmenta Robison, 1964a	P
ARTHROPODA (AGNOSTINA)	Pseudophalacroma	Pseudophalacroma lundgreni (Tullberg, 1880)	P
ARTHROPODA (AGNOSTINA)	Pseudophalacroma	Pseudophalacroma rigbyi (Robison, 1984a)	P
ARTHROPODA (AGNOSTINA)	Ptychagnostus	Ptychagnostus affinis (Broegger, 1878)	P
ARTHROPODA (AGNOSTINA)	Ptychagnostus	Ptychagnostus akanthodes Robison, 1964a	P
ARTHROPODA (AGNOSTINA)	Ptychagnostus	Ptychagnostus atavus (Tullberg, 1880)	P
ARTHROPODA (AGNOSTINA)	Ptychagnostus	Ptychagnostus cuyanus (Rusconi, 1948)	P
ARTHROPODA (AGNOSTINA)	Ptychagnostus	Ptychagnostus leptus Qian in Qiu et al., 1983	P
ARTHROPODA (AGNOSTINA)	Ptychagnostus	Ptychagnostus occultatus Öpik, 1979	P
ARTHROPODA (AGNOSTINA)	Ptychagnostus	Ptychagnostus punctuosus (Angelin, 1851)	P
ARTHROPODA (AGNOSTINA)	Tomagnostella	Tomagnostella exsculpta (Angelin, 1851)	P
ARTHROPODA (AGNOSTINA)	Trymataspis	Trymataspis depressa Robison, 1964a	P
ARTHROPODA (AGNOSTINA)	Utagnostus	Utagnostus songae Peng and Robison, 2000	P
ARTHROPODA (TRILOBITA)	Altiocculus	Altiocculus harrisi (Robison, 1971)	B(ep)
ARTHROPODA (TRILOBITA)	Asaphiscus	Asaphiscus wheeleri Meek, 1873	B(ep)
ARTHROPODA (TRILOBITA)	Athabaskiella	Athabaskiella proba (Walcott, 1916b)	B(ep)
ARTHROPODA (TRILOBITA)	Bathyuriscidella	Bathyuriscidella sp. Robison 1964a	B(ep)
ARTHROPODA (TRILOBITA)	Bathyuriscus	Bathyuriscus elegans (Walcott, 1916b)	B(ep)
ARTHROPODA (TRILOBITA)	Bathyuriscus	Bathyuriscus fimbriatus Robison, 1964a	B(ep)
ARTHROPODA (TRILOBITA)	Bolaspidella	Bolaspidella contracta Robison, 1964a	B(ep)
ARTHROPODA (TRILOBITA)	Bolaspidella	Bolaspidella jarrardi Robison & Babcock, 2011	B(ep)
ARTHROPODA (TRILOBITA)	Burlingia	Burlingia halgedahlae Robison & Babcock, 2011	B(ep)
ARTHROPODA (TRILOBITA)	Elrathia	Elrathia marjumi Robison, 1964a	B(ep)
ARTHROPODA (TRILOBITA)	Hemirhodon	Hemirhodon amplipyge Robison, 1964a	B(ep)
ARTHROPODA (TRILOBITA)	Modocia	Modocia laevinucha Robison, 1964a	B(ep)
ARTHROPODA (TRILOBITA)	Modocia	Modocia nuchaspina Robison, 1964a	B(ep)
ARTHROPODA (TRILOBITA)	Modocia	Modocia typicalis (Resser, 1938b)	B(ep)
ARTHROPODA (TRILOBITA)	Olenoides	Olenoides pugio (Walcott, 1908b)	B(ep)
ARTHROPODA (TRILOBITA)	Utaspis	Utaspis marjumensis (Resser, 1935)	B(ep)
ARTHROPODA (TRILOBITA)	Zacanthoides	Zacanthoides sp. Robison 1964a	B(ep)
ARTHROPODA (OTHERS)	Branchiocaris	Branchiocaris pretiosa?	P
ARTHROPODA (OTHERS)	Dicranocaris	Dicranocaris guntherorum Briggs et al., 2008	P
ARTHROPODA (OTHERS)	Dytikosicula	Dytikosicula desmatae Conway Morris et al. 2015a	B(ep) or P
ARTHROPODA (OTHERS)	Leanchoilia	Leanchoilia? sp. cf. protogonia Briggs et al. 2008	B(ep)
ARTHROPODA (OTHERS)	Meristosoma	Meristosoma sp. Robison & Wiley, 1995	B(ep)
ARTHROPODA (OTHERS)	Naraoia	Naraoia compacta Walcott, 1912a	B(ep)
ARTHROPODA (OTHERS)	Nettapezoura	Nettapezoura basilika Briggs et al. 2008	P
ARTHROPODA (OTHERS)	Perspicaris?	Perspicaris? ellipsopelta Robison & Richards, 1981	P
ARTHROPODA (OTHERS)	Tuzoia	Tuzoia guntheri Robison & Richards, 1981	P
ARTHROPODA (OTHERS)	Arthropoda gen. et sp. nov. A	Arthropoda gen. et sp. nov. A [This study]	B(ep)
STEM-ARTHROPODA (RADIODONTA)	Caryosyntrips	Caryosyntrips sp. [This study]	P
STEM-ARTHROPODA (RADIODONTA)	Baccaspinea	Buccaspinea cooperi gen. et sp. nov.	P
STEM-ARTHROPODA (RADIODONTA)	Pahvantia	Pahvantia hastata Robison & Richards, 1981	P
STEM-ARTHROPODA (RADIODONTA)	Peytoia	Peytoia nathorsti Walcott, 1911	P
ECHINODERMATA (SOLUTA)	Castericystis	Castericystis vali Ubaghs & Robison, 1985	B(ep)
ECHINODERMATA (EOCRINOIDEA)	Marjumicystis	Marjumicystis mettae Ubaghs and Robison, 1985	B(ep)
ECHINODERMATA (EDRIOASTEROIDEA)	Totiglobus?	Totiglobus? lloydi Sprinkle, 1985	B(ep)
HEMICHORDATA (PTEROBRANCHIA)	Mastograptus	Mastograptus sp. LoDuca & Kramer, 2014	B(ep)
HEMICHORDATA (PTEROBRANCHIA)	Sphenoecium	Sphenoecium wheelerensis Maletz & Steiner, 2015	B(ep)
INDETERMINATE	Eldonia	Eldonia ludwigi Walcott, 1911a	B(ep)
INDETERMINATE	Hyolithellus	Hyolithellus sp. Robison, 1991	B(en)
WEEKS LAGERSTAETTE EXCEPTIONALLY-PRESERVED BIOTA
Biota:	Fauna:				Lifestyles:
Total number of genera: 76	Total number of genera: 76				NB: Non-animal taxa are excluded
Total number of species: 81	Total number of species: 81				Lifestyles: B(en), endobenthic; B(ep), epibenthic; P, pelagic. The category 'epibenthic' includes all taxa principally living on the seafloor, even if they may be capable of temporary swimming (nektobenthic; e.g. most trilobites). The category 'pelagic' refers to the animals spending most of their lives in the water column some distance from the seafloor, either as active swimmers (nekton) or pas…
HIGH TAXA	GENUS	SPECIES	LIFESTYLE		Categories	# of genera	% of total generic diversity
PORIFERA	Crumillospongia?	Crumillospongia? sp. [Lerosey-Aubril et al. 2018]	B(ep)		Endobenthic	3	3.94737
PORIFERA	Diagonella	Diagonella sp. [Lerosey-Aubril et al. 2018]	B(ep)		Epibenthic	60	78.9474
PORIFERA	Halichondrites?	Halichondrites? sp. [Lerosey-Aubril et al. 2018]	B(ep)		Pelagic	13	17.1053
PORIFERA	Hazelia?	Hazelia? sp. [This study]	B(ep)
PORIFERA	Hintzespongia	Hintzespongia sp. [Lerosey-Aubril et al. 2018]	B(ep)
PORIFERA	Pirania	Pirania sp. [This study]	B(ep)
PORIFERA	Porifera gen et sp. indet. A	Porifera gen et sp. indet. A [Lerosey-Aubril et al. 2018]	B(ep)
PORIFERA	Porifera gen et sp. indet. B	Porifera gen et sp. indet. B [This study]	B(ep)
PORIFERA	Hexactinellid indet.	Hexactinellid indet.	B(ep)
CNIDARIA	Cambrorhytium	Cambrorhytium fragilis? (Walcott, 1911)	B(ep)
CNIDARIA	Cambrorhytium	Cambrorhytium major (Walcott, 1908d)	B(ep)
CNIDARIA	Cnidaria gen et sp. indet. A	Cnidaria gen et sp. indet. A [Lerosey-Aubril et al. 2018]	B(ep)
CNIDARIA?	Cnidaria? gen et sp. indet. B	Cnidaria? gen et sp. indet. B [This study]	P?
CTENOPHORA?	Ctenophora? gen et sp. indet. A	Ctenophora? gen et sp. indet. A	P?
BRACHIOPODA	Canthylotreta	Canthylotreta marjumensis (Walcott, 1908c)	B(ep)
BRACHIOPODA	Fordinia	Fordinia perfecta (Walcott, 1908)	B(ep)
BRACHIOPODA	Lingulella?	Lingulella? sp. [Peters, 2003]	B(ep)
BRACHIOPODA	Prototreta	Prototreta sp. [Beebe, 1990]	B(ep)
BRACHIOPODA	Ungulella	Ungulella sp. [Beebe, 1990]	B(ep)
MOLLUSCA	Tergomya? gen et sp. nov. A	Tergomya? gen et sp. nov. A	B(ep)
STEM-LOPHOPHORATA	Hyolithes?	Hyolithes? sp.	B(ep)
ANNELIDA	Polychaeta gen. et sp. nov. A	Polychaeta gen. et sp. nov. A [Lerosey-Aubril et al. 2018]	B(ep)
STEM-GNATHIFERA	Dakorhachis	Dakorhachis thambus Conway Morris et al. 2020	B(en)?
SCALIDOPHORA	Palaeoscolecida gen. et sp. nov. A	Palaeoscolecida gen. et sp. nov. A [Lerosey-Aubril et al. 2018]	B(en)
SCALIDOPHORA	Ottoia?	Ottoia? sp. [Lerosey-Aubril et al. 2018]	B(en)
SCALIDOPHORA	Selkirkia	Selkirkia sp. [This study]	B(ep)
ARTHROPODA (AGNOSTINA)	Acmarhachis	Acmarhachis typicalis Resser, 1938	P
ARTHROPODA (AGNOSTINA)	Ammagnostus	Ammagnostus laiwuensis (Lorenz, 1906)	P
ARTHROPODA (AGNOSTINA)	Clavagnostus	Clavagnostus spinosus (Resser 1838)	P
ARTHROPODA (AGNOSTINA)	Hypagnostus	Hypagnostus brevifrons (Angelin, 1851)	P
ARTHROPODA (AGNOSTINA)	Oedorhachis	Oedorhachis typicalis Resser, 1938	P
ARTHROPODA (AGNOSTINA)	Proagnostus	Proagnostus bulbus Butts, 1926	P
ARTHROPODA (AGNOSTINA)	Triadaspis	Triadaspis bigeneris Öpik, 1967	P
ARTHROPODA (TRILOBITA)	Arapahoia	Arapahoia spatulata Miller, 1936	B(ep)
ARTHROPODA (TRILOBITA)	Cedaria	Cedaria minor (Walcott, 1916)	B(ep)
ARTHROPODA (TRILOBITA)	Cedarina	Cedarina schachti Adrain et al., 2009	B(ep)
ARTHROPODA (TRILOBITA)	Coosella	Coosella kieri Robison & Babcock, 2011	B(ep)
ARTHROPODA (TRILOBITA)	Deiracephalus	Deiracephalus aster (Walcott, 1916)	B(ep)
ARTHROPODA (TRILOBITA)	Genevievella	Genevievella granulata (Walcott, 1916)	B(ep)
ARTHROPODA (TRILOBITA)	Hardyoides	Hardyoides tenerus (Walcott, 1916)	B(ep)
ARTHROPODA (TRILOBITA)	Ithycephalus	Ithycephalus stricklandi Robison & Babcock, 2011	B(ep)
ARTHROPODA (TRILOBITA)	Lonchocephalus	Lonchocephalus pholus Walcott, 1916	B(ep)
ARTHROPODA (TRILOBITA)	Meniscopsia	Meniscopsia beebei Robison & Babcock, 2011	B(ep)
ARTHROPODA (TRILOBITA)	Menomonia	Menomonia sahratiani Robison & Babcock, 2011	B(ep)
ARTHROPODA (TRILOBITA)	Menomonia	Menomonia semele (Walcott, 1916)	B(ep)
ARTHROPODA (TRILOBITA)	Meteoraspis	Meteoraspis dis (Walcott, 1916)	B(ep)
ARTHROPODA (TRILOBITA)	Modocia	Modocia comforti Robison & Babcock, 2011	B(ep)
ARTHROPODA (TRILOBITA)	Modocia	Modocia whiteleyi Robison & Babcock, 2011	B(ep)
ARTHROPODA (TRILOBITA)	Norwoodia	Norwoodia boninoi Robison & Babcock, 2011	B(ep)
ARTHROPODA (TRILOBITA)	Olenoides	Olenoides skabelundi Robison & Babcock, 2011	B(ep)
ARTHROPODA (TRILOBITA)	Pemphigaspis	Pemphigaspis sp. [This study]	B(ep)
ARTHROPODA (TRILOBITA)	Syspacheilus	Syspacheilus sp.	B(ep)
ARTHROPODA (TRILOBITA)	Tricrepicephalus	Tricrepicephalus texanus (Shumard, 1861)	B(ep)
ARTHROPODA (TRILOBITA)	Weeksina	Weeksina unispina (Walcott, 1916)	B(ep)
ARTHROPODA (OTHERS)	Arthropoda gen. et sp. nov. A	Arthropoda gen. et sp. nov. A [Lerosey-Aubril et al. 2018]	B(ep)
ARTHROPODA (OTHERS)	Arthropoda gen. et sp. nov. B	Arthropoda gen. et sp. nov. B [Lerosey-Aubril et al. 2018]	B(ep)
ARTHROPODA (OTHERS)	Arthropoda gen. et sp. nov. C	Arthropoda gen. et sp. nov. C [Lerosey-Aubril et al. 2018]	B(ep)
ARTHROPODA (OTHERS)	Arthropoda gen. et sp. nov. D	Arthropoda gen. et sp. nov. D [Lerosey-Aubril et al. 2018]	B(ep)
ARTHROPODA (OTHERS)	Arthropoda gen. et sp. nov. E	Arthropoda gen. et sp. nov. E [Lerosey-Aubril et al. 2018]	B(ep)
ARTHROPODA (OTHERS)	Arthropoda gen. et sp. nov. F	Arthropoda gen. et sp. nov. F [Lerosey-Aubril et al. 2018]	B(ep)
ARTHROPODA (OTHERS)	Arthropoda gen. et sp. nov. G	Arthropoda gen. et sp. nov. G [Lerosey-Aubril et al. 2018]	B(ep)
ARTHROPODA (OTHERS)	Arthropoda gen. et sp. nov. H	Arthropoda gen. et sp. nov. H [Lerosey-Aubril et al. 2018]	P
ARTHROPODA (OTHERS)	Arthropoda gen. et sp. nov. I	Arthropoda gen. et sp. nov. I [Lerosey-Aubril et al. 2018]	B(ep)
ARTHROPODA (OTHERS)	Arthropoda gen. et sp. nov. J	Arthropoda gen. et sp. nov. J [Lerosey-Aubril et al. 2018]	B(ep)
ARTHROPODA (OTHERS)	Bradoriida gen. et sp. nov. A	Bradoriida gen. et sp. nov. A [This study]	B(ep)
ARTHROPODA (OTHERS)	Megacheira gen. et sp. nov. A	Megacheira gen. et sp. nov. A [Lerosey-Aubril et al. 2018]	B(ep)
ARTHROPODA (OTHERS)	Aglaspis?	Aglaspis? sp. [Lerosey-Aubril et al. 2018]	B(ep)
ARTHROPODA (OTHERS)	Anabarochilina	Anabarochilina australis (Hinz-Schallreuter, 1993)	P
ARTHROPODA (OTHERS)	Anabarochilina	Anabarochilina primordialis (Linnarsson, 1869)	P
ARTHROPODA (OTHERS)	Beckwithia	Beckwithia typa Resser, 1931	B(ep)
ARTHROPODA (OTHERS)	Falcatamacaris	Falcatamacaris bellua Ortega-Hernández et al. 2015	B(ep)
ARTHROPODA (OTHERS)	Glypharthrus?	Glypharthrus? sp. [Lerosey-Aubril et al. 2018]	B(ep)
ARTHROPODA (OTHERS)	Notchia	Notchia weugi Lerosey-Aubril, 2015	B(ep)
ARTHROPODA (OTHERS)	Tremaglaspis	Tremaglaspis vanroyi Lerosey-Aubril et al., 2013	B(ep)
STEM-ARTHROPODA (RADIODONTA)	Anomalocaris	Anomalocaris aff. canadensis Whiteaves, 1892 [Lerosey-Aubril et al. 2014]	P
RADIODONTA	Anomalocaris	Anomalocaris sp. [Lerosey-Aubril et al. 2014]	P
ECHINODERMATA (SOLUTA)	Pavhanticystis	Pavhanticystis utahensis Lefebvre & Lerosey-Aubril, 2018	B(ep)
INDETERMINATE	Kinzeria	Kinzeria sp. nov. [Lerosey-Aubril et al. 2018]	B(ep)
INDETERMINATE	Problematicum gen. et sp. nov. A	Problematicum gen. et sp. nov. A [Lerosey-Aubril et al. 2018]	B(ep)
INDETERMINATE	Problematicum gen. et sp. nov. B	Problematicum gen. et sp. nov. B [Lerosey-Aubril et al. 2018]	B(ep)
INDETERMINATE	Problematicum gen. et sp. nov. C	Problematicum gen. et sp. nov. C [Lerosey-Aubril et al. 2018]	P?
